# Supplementary material for: A Draft Genome of the Honey Bee Trypanosomatid Parasite Crithidia mellificae
Source: PLOS journal article supplement (doi:10.1371/journal.pone.0095057), 2014-04-17
Supplement: S1 (10.1371/journal.pone.0095057.s001) [file journal.pone.0095057.s001]

Supporting Figure S1. Nucleotide alignment of all *C. mellificae* GAPDH sequences in NCBI (JF423199, AB716357, AB745489); these sequences are 99.8% identical.

[illegible]
