# Supplementary material for: A Draft Genome of the Honey Bee Trypanosomatid Parasite Crithidia mellificae
Source: PLOS journal article supplement (doi:10.1371/journal.pone.0095057), 2014-04-17
Supplement: S2 (10.1371/journal.pone.0095057.s002) [file journal.pone.0095057.s002]

|                                                 |                        |        |   |          |     |                       |        |         |    |        |
|-------------------------------------------------|------------------------|--------|---|----------|-----|-----------------------|--------|---------|----|--------|
| 1. <i>Critidia mellifica</i> strain SF GAPDH    | ACGTCATCCAGGAGATCGACGC | GCCTCT | C | AGAGAGCG | CCG | AGACATCAATGAAGCGGCTCT | CCCTCA | CACGGAG | AG | GAAGTC |
| 2. <i>Critidia oncopelti</i> EU079133           | ACGTCATCCAGGAGATCGACGC | GCCTCT | C | AGAGAGCG | CCG | AGACATCAATGAAGCGGCTCT | CCCTCA | CACGGAG | AG | GAAGTC |
| 3. <i>Critidia bombi</i> GU321192               | ACGTCATCCAGGAGATCGACGC | GCCTCT | C | AGAGAGCG | CCG | AGACATCAATGAAGCGGCTCT | CCCTCA | CACGGAG | AG | GAAGTC |
| 4. <i>Critidia expoeki</i> GU321193             | ACGTCATCCAGGAGATCGACGC | GCCTCT | C | AGAGAGCG | CCG | AGACATCAATGAAGCGGCTCT | CCCTCA | CACGGAG | AG | GAAGTC |
| 5. <i>Leptomonas jaderae</i> EU076603           | ACGTCATCCAGGAGATCGACGC | GCCTCT | C | AGAGAGCG | CCG | AGACATCAATGAAGCGGCTCT | CCCTCA | CACGGAG | AG | GAAGTC |
| 6. <i>Blasiorithidia gericola</i> AF322391      | ACGTCATCCAGGAGATCGACGC | GCCTCT | C | AGAGAGCG | CCG | AGACATCAATGAAGCGGCTCT | CCCTCA | CACGGAG | AG | GAAGTC |
| 7. <i>Wallaceina brevicula</i> AF316620         | ACGTCATCCAGGAGATCGACGC | GCCTCT | C | AGAGAGCG | CCG | AGACATCAATGAAGCGGCTCT | CCCTCA | CACGGAG | AG | GAAGTC |
| 8. <i>Critidia deanei</i> EF46792               | ACGTCATCCAGGAGATCGACGC | GCCTCT | C | AGAGAGCG | CCG | AGACATCAATGAAGCGGCTCT | CCCTCA | CACGGAG | AG | GAAGTC |
| 9. <i>Leptomonas bifurcata</i> DQ910928         | ACGTCATCCAGGAGATCGACGC | GCCTCT | C | AGAGAGCG | CCG | AGACATCAATGAAGCGGCTCT | CCCTCA | CACGGAG | AG | GAAGTC |
| 10. <i>Critidia insperata</i> EU076605          | ACGTCATCCAGGAGATCGACGC | GCCTCT | C | AGAGAGCG | CCG | AGACATCAATGAAGCGGCTCT | CCCTCA | CACGGAG | AG | GAAGTC |
| 11. <i>Critidia fasciculata</i> AF047493        | ACGTCATCCAGGAGATCGACGC | GCCTCT | C | AGAGAGCG | CCG | AGACATCAATGAAGCGGCTCT | CCCTCA | CACGGAG | AG | GAAGTC |
| 12. <i>Leishmania braziliensis</i> XM_001566870 | ACGTCATCCAGGAGATCGACGC | GCCTCT | C | AGAGAGCG | CCG | AGACATCAATGAAGCGGCTCT | CCCTCA | CACGGAG | AG | GAAGTC |
| 13. <i>Leishmania major</i> XM_001684852        | ACGTCATCCAGGAGATCGACGC | GCCTCT | C | AGAGAGCG | CCG | AGACATCAATGAAGCGGCTCT | CCCTCA | CACGGAG | AG | GAAGTC |
| 14. <i>Trypanosoma brucei</i> XM_840453         | ACGTCATCCAGGAGATCGACGC | GCCTCT | C | AGAGAGCG | CCG | AGACATCAATGAAGCGGCTCT | CCCTCA | CACGGAG | AG | GAAGTC |
| 15. <i>Trypanosoma cruzi</i> XM_808703          | ACGTCATCCAGGAGATCGACGC | GCCTCT | C | AGAGAGCG | CCG | AGACATCAATGAAGCGGCTCT | CCCTCA | CACGGAG | AG | GAAGTC |
